# Supplementary material for: Passive sampling in combination with thermal desorption and gas chromatography as a tool for self-assessment of chemical exposure
Source: Royal Society of Chemistry journal article supplement (doi:10.1039/b203307k), 2002-01-01
Supplement: results.doc [file results.doc]

Name: *Worker*

# Results from the measurements

The results from the measurements are presented as bar in the enclosed diagram. Both the most recent and all previous, values are included.

As can be seen in the diagram the results of the measurements vary from day to day. Today the occupational exposure limit, which corresponds to the mean exposure during a working day, is 150 mg/m3. The long-term health effects of styrene are due to the mean exposure level over an extended period of time, while acute toxicity depends on the mean level of exposure of one day. More frequent measurements provide a better picture of the mean exposure, as well as a clearer view of the variation between different working days.

After each sample you collect is analyzed, you will receive a new document including all the measurements.

Your own comments on the latest measurement:

Best regards

Ingrid Liljelind

Dept. of Occupational and Environmental Medicine

Umeå University

S-901 87 UMEÅ

Phone: 090-785 24 52, fax: 090-785 24 56, e-mail: ingrid.liljelind@envmed.umu.se

Company: *Company*

Results from the terpene measurements

This is a summary of all the styrene measurements involving the participating workers. To obtain a clear picture of the mean exposure in the working environment, several samples must be collected on each occasion. In the diagram, the measurements corresponding to each individual are displayed. The mean exposure value of all these measurements is 61 mg/m3. All the measurements are below the occupational exposure limit of 150 mg/m3, except for three measurements.

The numbers in parentheses indicate the numbers of samples yielding the same result.

Why do the results vary between measurements?

In reality, the exposure of an individual may often vary from one day to another. Experience from other studies shows, for example, that the individuals’ exposure can vary from 0.1 mg/m3 to 1.0 mg/m3 on a daily basis without implying that any errors have been made in the measurements. The variability depends on many factors, for example, how close to the source of exposure one is standing, how often one performs a particular task and how efficient the ventilation system is.

Best regards

Ingrid Liljelind

Dept. of Occupational and Environmental Medicine

Umeå University

S-901 87 UMEÅ

##### Phone: 090-785 24 52, fax: 090-785 24 56, e-mail: ingrid.liljelind@envmed.umu.se
